# Supplementary material for: Spirituality and Sustainable Development: A Systematic Word Frequency Analysis and an Agenda for Research in Pacific Island Countries
Source: MDPI journal article supplement (doi:10.3390/su15032201), 2023-01-24
Supplement: s1 [file s1]

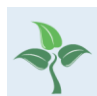

**Table S1.** List of Pacific Countries NGOs are providing Aid. (\*) Includes development programming work among Indigenous, Aboriginal, Torres Strait Islands, and/or First Nations communities in Australia and New Zealand.

| Countries                     |
|-------------------------------|
| Australia (*)                 |
| Bougainville                  |
| Cook Islands                  |
| Fiji                          |
| Kiribati                      |
| Nauru                         |
| New Zealand (*)               |
| Niue                          |
| Papua New Guinea              |
| Samoa                         |
| Solomon Island                |
| Tonga                         |
| Tuvalu                        |
| US-Affiliated Pacific Islands |
| Vanuatu                       |

**Table S2.** Organisations selected based on highest total annual income, including DFAT funding and non-DFAT funding (data and analyses self-consistently colour-coded).

| #                                                   | Name of NGO – DFAT-Funded/Accredited Faith-Based <sup>1</sup>     | Total DFAT funding (\$) | Non-DFAT funding (\$) | Total Income (\$)              | % DFAT Funding to Total Income | Annual report (year) |
|-----------------------------------------------------|-------------------------------------------------------------------|-------------------------|-----------------------|--------------------------------|--------------------------------|----------------------|
| 1                                                   | World Vision Australia (WVA)                                      | 62,600,000              | 524,400,000           | 587,000,000                    | 10.7                           | 2020                 |
| 2                                                   | Caritas Australia                                                 | 8,028,846               | 30,199,925            | 38,228,771                     | 21.0                           | 2020                 |
| 3                                                   | CBM Australia                                                     | 6,035,000               | 23,582,000            | 29,617,000                     | 20.4                           | 2019                 |
| 4                                                   | Adventist Development & Relief Agency (ADRA)                      | 5,186,052               | 16,734,812            | 21,920,864                     | 23.7                           | 2020                 |
| 5                                                   | Transform Aid International                                       | 3,875,004               | 16,026,675            | 19,901,679                     | 19.5                           | 2020                 |
| 6                                                   | TEAR Australia                                                    | 4,160,756               | 12,015,610            | 16,176,366                     | 25.7                           | 2020                 |
| 7                                                   | Muslim Aid International                                          | 150,000                 | 16,000,620            | 16,150,620                     | 0.9                            | 2019                 |
| 8                                                   | Act for Peace–National Council of Churches Australia (NCCA)       | 2,243,945               | 11,362,198            | 13,606,143                     | 16.5                           | 2020                 |
| 9                                                   | YWAM Medical Ships                                                | 491,763                 | 11,377,552            | 11,869,315                     | 4.1                            | 2019                 |
| 10                                                  | Australian Lutheran World Service (ALWS)                          | 2,692,246               | 4,550,854             | 7,243,100                      | 37.2                           | 2019                 |
| <b>Total Funding / Average percent DFAT funding</b> |                                                                   | <b>94,591,366</b>       | <b>668,811,392</b>    | <b>763,402,758</b>             | <b>12.4</b>                    |                      |
|                                                     | Name of NGO – DFAT-Funded/Accredited Non-Faith-Based <sup>2</sup> | Total DFAT funding (\$) | Non-DFAT funding (\$) | Total Income (\$) <sup>3</sup> | % DFAT Funding to Total Income | Annual report (year) |
| 11                                                  | Save the Children Australia (SCA)                                 | 28,772,000              | 105,489,000           | 134,261,000                    | 21.4                           | 2019                 |
| 12                                                  | The Fred Hollows Foundation (FHF)                                 | 11,189,000              | 84,856,000            | 96,045,000                     | 11.6                           | 2019                 |
| 13                                                  | Oxfam Australia                                                   | 20,944,000              | 54,233,000            | 75,177,000                     | 27.9                           | 2020                 |
| 14                                                  | CARE Australia                                                    | 12,202,267              | 57,713,772            | 69,916,039                     | 17.5                           | 2020                 |
| 15                                                  | Royal Australian College of Surgeons                              | 3,152,142               | 66,005,086            | 69,157,228                     | 4.6                            | 2018                 |
| 16                                                  | ChildFund Australia                                               | 7,215,482               | 45,869,874            | 53,085,356                     | 13.6                           | 2020                 |
| 17                                                  | PLAN International Australia                                      | 14,512,000              | 37,450,000            | 51,962,000                     | 27.9                           | 2020                 |
| 18                                                  | AVI                                                               | 42,666,202              | 1,491,905             | 44,158,107                     | 96.6                           | 2020                 |
| 19                                                  | UNICEF Australia                                                  | 3,000,853               | 31,722,803            | 34,723,656                     | 8.6                            | 2019                 |
| 20                                                  | Marie Stopes International Australia (MSIA)                       | 9,035,993               | 15,334,037            | 24,370,030                     | 37.1                           | 2019                 |
| <b>Total Funding / Average percent DFAT funding</b> |                                                                   | <b>152,689,939</b>      | <b>500,165,477</b>    | <b>652,855,416</b>             | <b>23.4</b>                    |                      |
|                                                     | Name of NGO – Non-DFAT-Funded/Accredited Faith-Based              | Total DFAT funding (\$) | Non-DFAT funding (\$) | Total Income (\$)              | % DFAT Funding to Total Income | Annual report (year) |
| 21                                                  | Anglican Aid                                                      | 0                       | 3,772,777             | 3,772,777                      | 0                              | 2019                 |
| 22                                                  | Australian Marist Solidarity Ltd                                  | 0                       | 2,708,815             | 2,708,815                      | 0                              | 2019                 |
| 23                                                  | Mercy Works Ltd                                                   | 0                       | 2,465,441             | 2,465,441                      | 0                              | 2020                 |
| 24                                                  | Salesian Missions                                                 | 0                       | 1,689,409             | 1,689,409                      | 0                              | 2019                 |
| 25                                                  | <u>Australian Mercy</u>                                           | 0                       | 1,106,815             | 1,106,815                      | 0                              | 2020                 |
| 26                                                  | Marist Mission Centre                                             | 0                       | 612,989               | 612,989                        | 0                              | 2020                 |
| 27                                                  | HealthServe Australia                                             | 0                       | 255,442               | 255,442                        | 0                              | 2020                 |
| 28                                                  | Door of Hope Australia Inc                                        | 0                       | 87,296                | 87,296                         | 0                              | 2019                 |
| 29                                                  | International Christian Aid and Relief Enterprises Ltd            | 0                       | 65,428                | 65,428                         | 0                              | 2020                 |

<sup>1</sup> Accredited NGOs include both full and base DFAT accreditation.

<sup>2</sup> Accredited NGOs include both full and base DFAT accreditation.

<sup>3</sup> Voluntary hours are calculated into the total income for many NGOs.

| 30                                                  | MAF International                                               | 0                              | 15,642                       | 15,642                   | 0                                     | 2019                        |
|-----------------------------------------------------|-----------------------------------------------------------------|--------------------------------|------------------------------|--------------------------|---------------------------------------|-----------------------------|
| <b>Total Funding / Average percent DFAT funding</b> |                                                                 |                                | <b>12,780,054</b>            | <b>12,780,054</b>        | <b>0</b>                              |                             |
|                                                     | <b>Name of NGO – Non-DFAT-Funded/Accredited Non-Faith Based</b> | <b>Total DFAT funding (\$)</b> | <b>Non-DFAT funding (\$)</b> | <b>Total Income (\$)</b> | <b>% DFAT Funding to Total Income</b> | <b>Annual report (year)</b> |
| 31                                                  | Murdoch Children’s Research Institute                           | 0                              | 172,350,000                  | 172,350,000              | 0                                     | 2019                        |
| 32                                                  | Global Development Group                                        | 0                              | 28,792,584                   | 28,792,584               | 0                                     | 2020                        |
| 33                                                  | RedR Australia                                                  | 0                              | 15,187,596                   | 15,187,596               | 0                                     | 2020                        |
| 34                                                  | Australasian Society for HIV Medicine                           | 0                              | 11,583,707                   | 11,583,707               | 0                                     | 2020                        |
| 35                                                  | Australian Federation of AIDS Organisations                     | 0                              | 5,736,505                    | 5,736,505                | 0                                     | 2020                        |
| 36                                                  | Friend of Femili PNG                                            | 0                              | 5,001,550                    | 5,001,550                | 0                                     | 2020                        |
| 37                                                  | Business for Development                                        | 0                              | 1,911,642                    | 1,911,642                | 0                                     | 2020                        |
| 38                                                  | Australian Cervical Cancer Foundation                           | 0                              | 1,626,801                    | 1,626,801                | 0                                     | 2020                        |
| 39                                                  | Australian Respiratory Council                                  | 0                              | 285,514                      | 285,514                  | 0                                     | 2019                        |
| 40                                                  | Foresight (Overseas Aid and Prevention of Blindness             | 0                              | 131,943                      | 131,943                  | 0                                     | 2020                        |
| <b>Total Funding / Average percent DFAT funding</b> |                                                                 |                                | <b>242,607,842</b>           | <b>242,607,842</b>       | <b>0</b>                              |                             |

**Table S3.** Intercoder reliability guidelines informed the identification of the final list of selected keywords; the four main topics in each report were identified from subcategories.

| Categories           | Subcategories              |
|----------------------|----------------------------|
| Religion             | Spirit*                    |
|                      | Relig*                     |
|                      | Indig*                     |
|                      | Aborig*                    |
|                      | Faith/s (excl. faithful)   |
|                      | Church/es                  |
|                      | God                        |
| Economic/development | Econom*                    |
|                      | Economic                   |
|                      | Develop*                   |
|                      | Development                |
| Sustainability       | Sustain*                   |
|                      | Sustainability             |
| Social/Community     | Justice (incl inj*)        |
|                      | Social (excl social media) |
|                      | Partner*                   |
|                      | Communit*                  |

**Table S4.** Four categories of Australian NGO annual reports with code frequencies of key terms (data and analyses are self-consistently colour-coded).

| NGO                            | no | Report page count | Report word count | Total Income (\$) | Religion |     |     |     |     |     |    |  | Economic |     |     |      | Sustainability |      | Social Community |     |     |      | Total |
|--------------------------------|----|-------------------|-------------------|-------------------|----------|-----|-----|-----|-----|-----|----|--|----------|-----|-----|------|----------------|------|------------------|-----|-----|------|-------|
|                                |    |                   |                   |                   | Sp       | Rel | Ind | Abo | Fth | Chr | G  |  | Ec       | Eco | Dev | Devt | Sus            | Sust | Just             | Soc | Prt | Comm |       |
| Accredited Faith-Based NGO     | 1  | 47                | 12753             | \$ 587,000,000    | 3        | 3   | 0   | 1   | 7   | 2   | 3  |  | 8        | 7   | 42  | 33   | 7              | 5    | 3                | 5   | 45  | 78   | 252   |
|                                | 2  | 32                | 10713             | \$ 38,228,771     | 4        | 3   | 5   | 2   | 2   | 7   | 5  |  | 11       | 10  | 33  | 28   | 11             | 7    | 18               | 13  | 29  | 76   | 264   |
|                                | 3  | 40                | 7616              | \$ 23,617,000     | 0        | 0   | 0   | 0   | 3   | 5   | 3  |  | 1        | 1   | 56  | 47   | 9              | 3    | 1                | 3   | 37  | 39   | 208   |
|                                | 4  | 20                | 4946              | \$ 21,320,864     | 2        | 1   | 0   | 1   | 0   | 12  | 2  |  | 0        | 0   | 20  | 20   | 2              | 2    | 1                | 0   | 9   | 30   | 102   |
|                                | 5  | 34                | 8507              | \$ 19,901,679     | 0        | 0   | 0   | 0   | 5   | 22  | 7  |  | 4        | 4   | 58  | 48   | 6              | 2    | 3                | 7   | 57  | 52   | 275   |
|                                | 6  | 73                | 19868             | \$ 16,176,366     | 3        | 0   | 4   | 3   | 7   | 33  | 29 |  | 14       | 11  | 48  | 41   | 15             | 8    | 52               | 17  | 91  | 82   | 458   |
|                                | 7  | 62                | 5692              | \$ 16,150,620     | 1        | 4   | 0   | 0   | 0   | 0   | 0  |  | 4        | 4   | 21  | 11   | 13             | 11   | 0                | 2   | 12  | 13   | 96    |
|                                | 8  | 56                | 16596             | \$ 13,606,143     | 0        | 6   | 2   | 0   | 7   | 74  | 3  |  | 12       | 10  | 45  | 43   | 26             | 25   | 16               | 6   | 119 | 101  | 495   |
|                                | 9  | 94                | 20452             | \$ 11,869,315     | 0        | 0   | 0   | 0   | 0   | 3   | 0  |  | 2        | 2   | 26  | 17   | 1              | 1    | 0                | 1   | 27  | 68   | 148   |
|                                | 10 | 42                | 13255             | \$ 7,243,100      | 0        | 3   | 1   | 0   | 0   | 35  | 2  |  | 3        | 2   | 44  | 35   | 8              | 5    | 12               | 7   | 39  | 71   | 267   |
| Accredited Non-Faith-Based NGO | 11 | 57                | 16864             | \$ 134,261,000    | 0        | 1   | 2   | 3   | 0   | 0   | 0  |  | 8        | 8   | 18  | 16   | 6              | 4    | 4                | 7   | 10  | 12   | 99    |
|                                | 12 | 45                | 14550             | \$ 96,045,000     | 3        | 1   | 30  | 32  | 0   | 0   | 0  |  | 7        | 3   | 37  | 28   | 10             | 6    | 0                | 7   | 52  | 79   | 295   |
|                                | 13 | 68                | 16492             | \$ 75,177,000     | 0        | 1   | 1   | 6   | 1   | 0   | 0  |  | 7        | 6   | 37  | 28   | 9              | 9    | 25               | 4   | 44  | 73   | 251   |
|                                | 14 | 28                | 9218              | \$ 69,916,039     | 0        | 1   | 0   | 0   | 0   | 0   | 0  |  | 3        | 3   | 20  | 17   | 2              | 1    | 6                | 6   | 26  | 25   | 110   |
|                                | 15 | 36                | 12913             | \$ 69,157,228     | 0        | 2   | 11  | 23  | 0   | 0   | 0  |  | 0        | 0   | 53  | 36   | 6              | 3    | 0                | 1   | 20  | 27   | 182   |
|                                | 16 | 8                 | 2450              | \$ 53,085,356     | 0        | 0   | 0   | 0   | 0   | 0   | 0  |  | 2        | 2   | 13  | 10   | 0              | 0    | 0                | 8   | 7   | 30   | 72    |
|                                | 17 | 44                | 14229             | \$ 51,962,000     | 1        | 1   | 0   | 2   | 0   | 0   | 0  |  | 12       | 12  | 39  | 29   | 8              | 0    | 3                | 16  | 36  | 73   | 232   |
|                                | 18 | 59                | 18534             | \$ 44,158,107     | 0        | 0   | 0   | 0   | 0   | 0   | 0  |  | 18       | 15  | 37  | 35   | 9              | 6    | 1                | 3   | 18  | 14   | 156   |
|                                | 19 | 42                | 14691             | \$ 34,723,656     | 1        | 0   | 0   | 0   | 0   | 1   | 0  |  | 0        | 0   | 48  | 43   | 12             | 10   | 1                | 9   | 37  | 51   | 213   |
|                                | 20 | 24                | 5568              | \$ 24,370,030     | 0        | 1   | 0   | 0   | 0   | 0   | 0  |  | 4        | 2   | 8   | 4    | 0              | 0    | 0                | 7   | 8   | 12   | 46    |
| Non-Funded Faith-Based NGO     | 21 | 36                | 12707             | \$ 3,772,777      | 2        | 3   | 4   | 0   | 4   | 49  | 28 |  | 2        | 2   | 60  | 53   | 8              | 5    | 1                | 8   | 53  | 121  | 403   |
|                                | 22 | 36                | 6280              | \$ 2,708,815      | 2        | 0   | 0   | 0   | 0   | 1   | 0  |  | 1        | 1   | 17  | 13   | 4              | 4    | 0                | 3   | 11  | 23   | 80    |
|                                | 23 | 5                 | 2551              | \$ 2,465,441      | 0        | 1   | 2   | 2   | 0   | 0   | 0  |  | 1        | 1   | 4   | 4    | 0              | 0    | 1                | 2   | 1   | 6    | 25    |
|                                | 24 | 28                | 7345              | \$ 1,689,409      | 4        | 16  | 0   | 0   | 1   | 3   | 6  |  | 5        | 4   | 36  | 30   | 5              | 1    | 1                | 4   | 18  | 26   | 160   |
|                                | 25 | 73                | 22687             | \$ 1,106,815      | 0        | 3   | 0   | 0   | 0   | 6   | 4  |  | 5        | 4   | 54  | 38   | 16             | 9    | 3                | 8   | 43  | 69   | 262   |
|                                | 26 | 22                | 6147              | \$ 612,989        | 1        | 8   | 0   | 4   | 1   | 2   | 0  |  | 1        | 1   | 21  | 20   | 12             | 4    | 3                | 5   | 19  | 18   | 120   |
|                                | 27 | 24                | 5962              | \$ 255,442        | 4        | 1   | 0   | 1   | 4   | 2   | 7  |  | 0        | 0   | 18  | 12   | 6              | 5    | 1                | 3   | 21  | 22   | 107   |
|                                | 28 | 13                | 3992              | \$ 87,296         | 0        | 0   | 0   | 0   | 0   | 8   | 0  |  | 4        | 2   | 4   | 3    | 8              | 6    | 0                | 0   | 10  | 7    | 52    |
|                                | 29 | 21                | 3746              | \$ 65,428         | 0        | 0   | 0   | 0   | 0   | 0   | 0  |  | 3        | 3   | 15  | 13   | 1              | 1    | 0                | 3   | 7   | 9    | 55    |
|                                | 30 | 16                | 3670              | \$ 15,642         | 4        | 1   | 0   | 0   | 2   | 7   | 5  |  | 1        | 1   | 5   | 5    | 0              | 0    | 0                | 1   | 13  | 16   | 61    |
| Non-Funded Non-Faith-Based NGO | 31 | 52                | 15212             | \$ 172,350,000    | 3        | 0   | 1   | 7   | 0   | 0   | 0  |  | 0        | 0   | 49  | 27   | 11             | 1    | 0                | 4   | 33  | 38   | 174   |
|                                | 32 | 32                | 7788              | \$ 28,792,584     | 0        | 0   | 0   | 0   | 0   | 0   | 0  |  | 3        | 2   | 104 | 98   | 9              | 3    | 1                | 4   | 55  | 39   | 318   |
|                                | 33 | 14                | 4620              | \$ 15,187,536     | 0        | 0   | 0   | 0   | 0   | 0   | 0  |  | 2        | 2   | 9   | 6    | 4              | 3    | 0                | 2   | 32  | 13   | 73    |
|                                | 34 | 94                | 27525             | \$ 11,583,707     | 0        | 2   | 19  | 16  | 0   | 2   | 0  |  | 10       | 10  | 70  | 40   | 12             | 2    | 2                | 4   | 30  | 39   | 258   |
|                                | 35 | 42                | 10968             | \$ 5,736,505      | 2        | 1   | 0   | 10  | 0   | 0   | 0  |  | 5        | 4   | 13  | 6    | 9              | 2    | 3                | 9   | 8   | 44   | 116   |
|                                | 36 | 33                | 8506              | \$ 5,001,550      | 0        | 0   | 0   | 0   | 1   | 6   | 0  |  | 2        | 2   | 20  | 13   | 0              | 0    | 1                | 3   | 50  | 20   | 118   |
|                                | 37 | 58                | 13391             | \$ 1,911,642      | 1        | 0   | 0   | 0   | 0   | 0   | 0  |  | 23       | 22  | 111 | 74   | 30             | 23   | 0                | 6   | 33  | 49   | 372   |
|                                | 38 | 48                | 12647             | \$ 1,626,801      | 1        | 0   | 1   | 0   | 0   | 0   | 0  |  | 4        | 4   | 31  | 12   | 8              | 4    | 0                | 0   | 16  | 9    | 90    |
|                                | 39 | 50                | 18394             | \$ 285,514        | 0        | 1   | 0   | 6   | 0   | 0   | 0  |  | 6        | 6   | 45  | 27   | 6              | 6    | 0                | 8   | 13  | 38   | 162   |
|                                | 40 | 32                | 7890              | \$ 131,943        | 0        | 0   | 0   | 0   | 0   | 0   | 0  |  | 4        | 4   | 14  | 7    | 2              | 2    | 1                | 2   | 4   | 5    | 45    |
