# Supplementary material for: Spirituality and Sustainable Development: A Systematic Word Frequency Analysis and an Agenda for Research in Pacific Island Countries
Source: MDPI journal article supplement (doi:10.3390/su15032201), 2023-01-24
Supplement: s1 [file s1]

Archive with 1 entries (1 files):
- sustainability-2145639-supplementary.pdf
